# Supplementary material for: Synthesis and monoamine uptake inhibition of conformationally constrained 2β-carbomethoxy-3β-phenyl tropanes
Source: Royal Society of Chemistry journal article supplement (doi:10.1039/b902863c), 2009-01-01
Supplement: b902863c.pdf [file b902863c.pdf]

# Synthesis and monoamine uptake inhibition of conformationally constrained 2 $\beta$ -carbomethoxy-3 $\beta$ -phenyl tropanes

Patrick Johannes Riss\*,<sup>[a]</sup> René Hummerich,<sup>[b]</sup> Patrick Schloss<sup>[b]</sup>

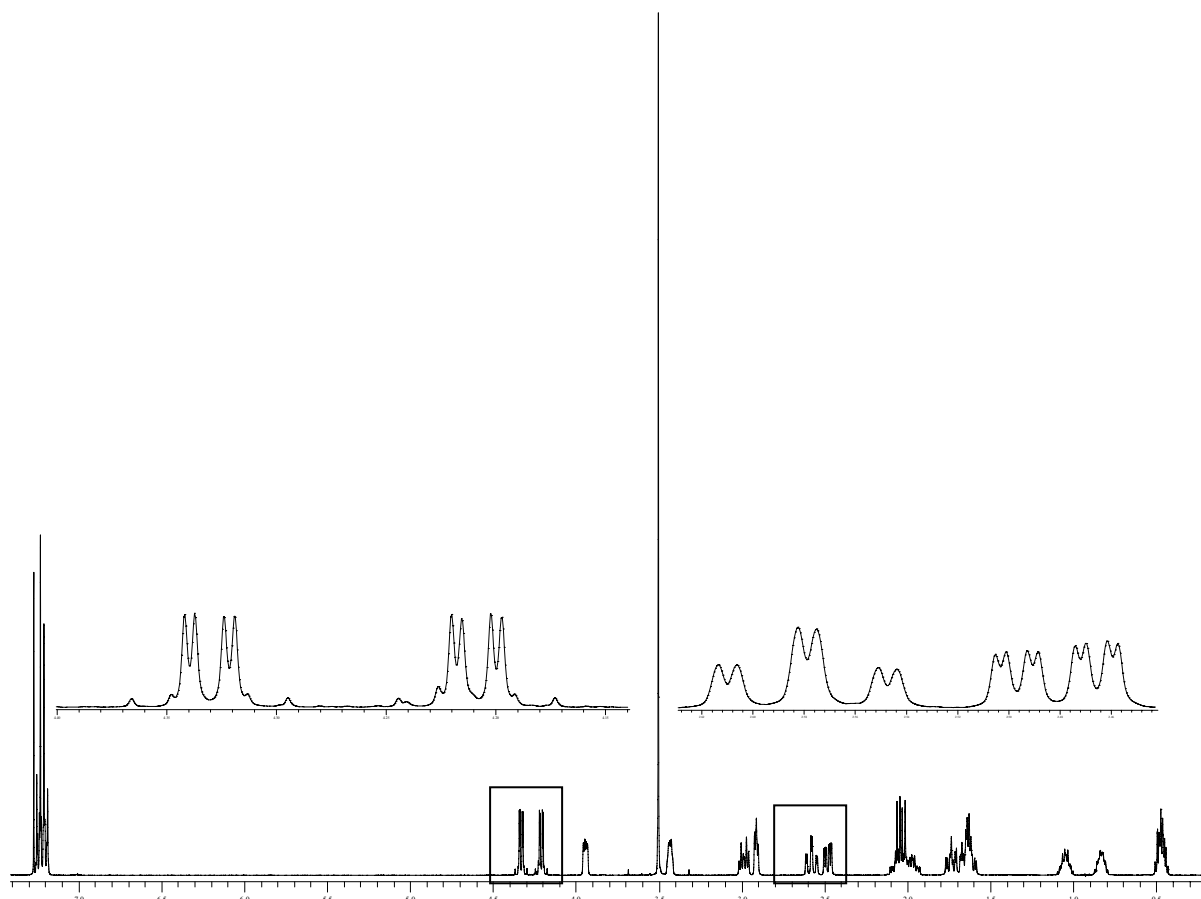

Figure 1: 400 MHz proton spectrum of PRD09 (7j) recorded on a Bruker AV400 spectrometer.

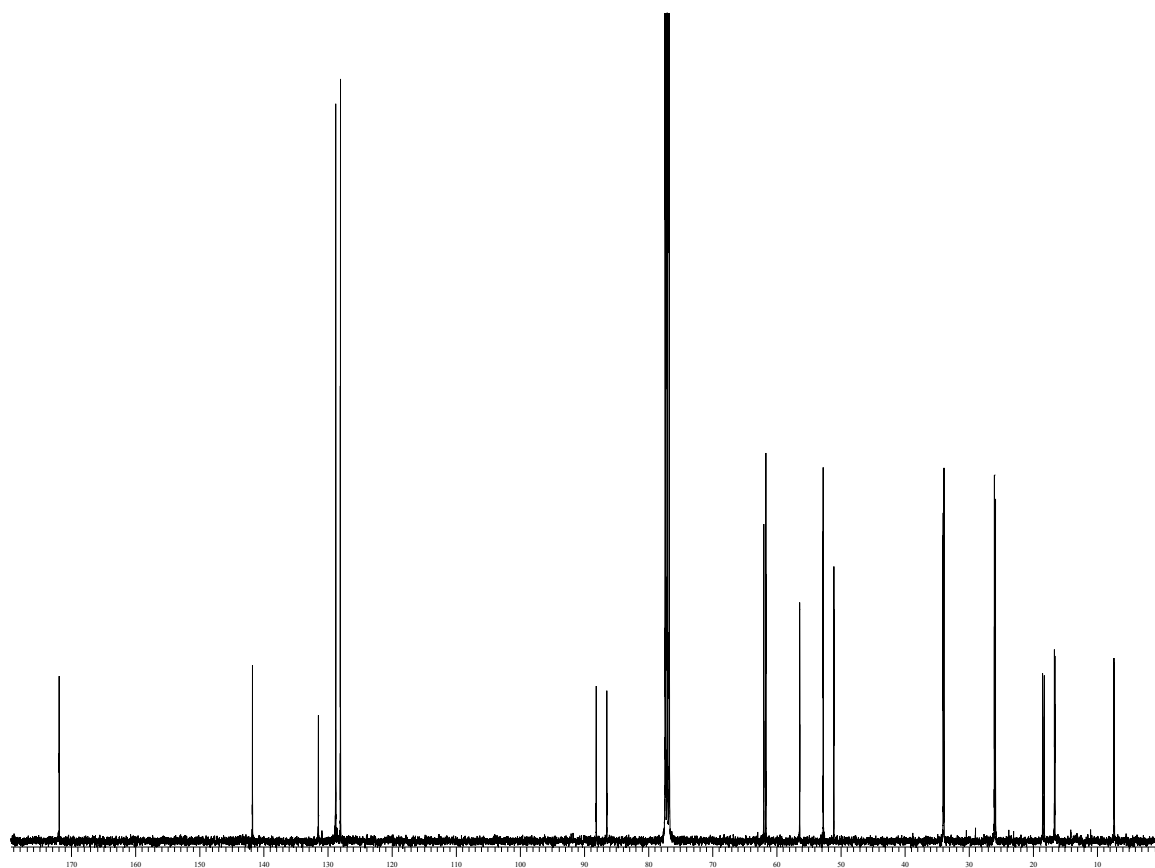

Figure 2: 100 MHz  $^{13}\text{C}$  spectrum of PRD09 (**7j**) recorded on a Bruker AV400 spectrometer.

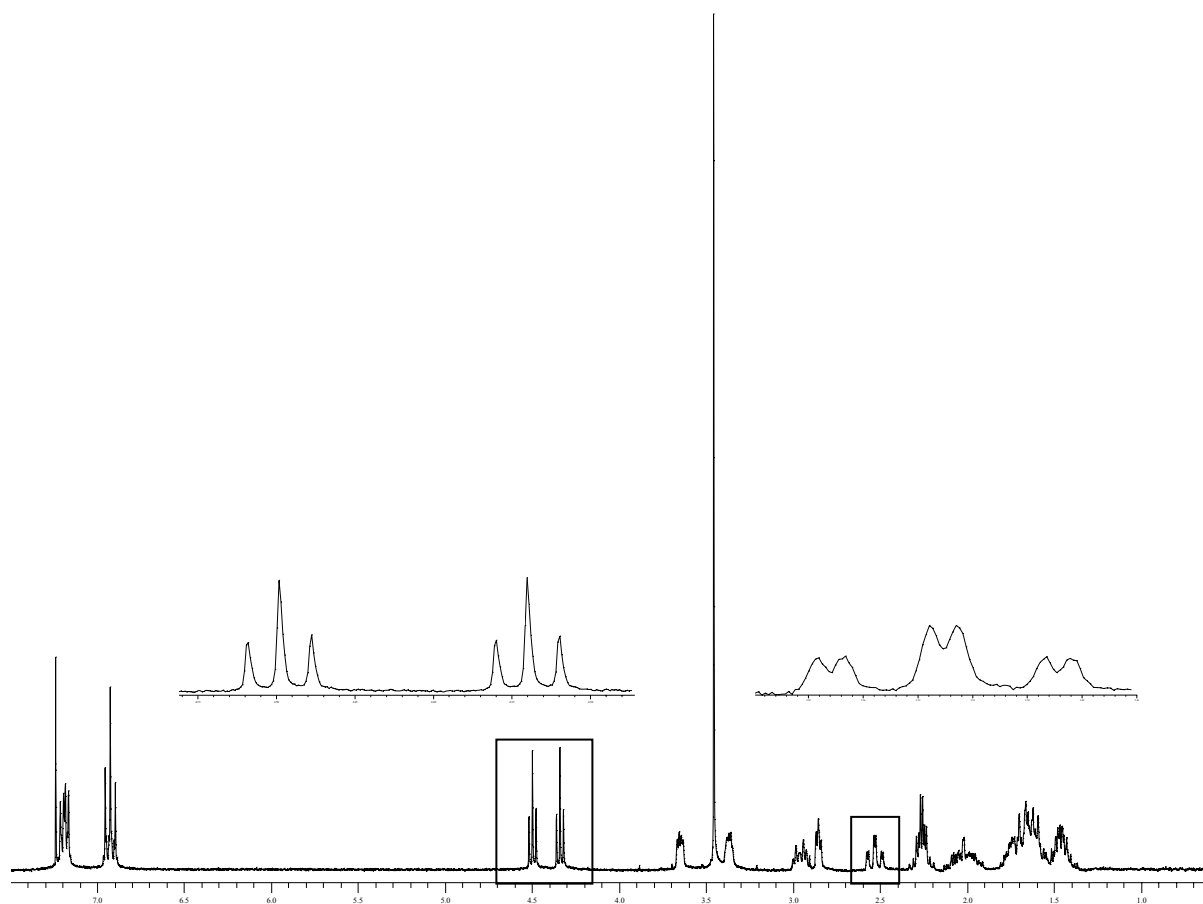

Figure 3: 300 MHz proton spectrum of PRD11 (**7c**) recorded on a Bruker AC300 spectrometer.

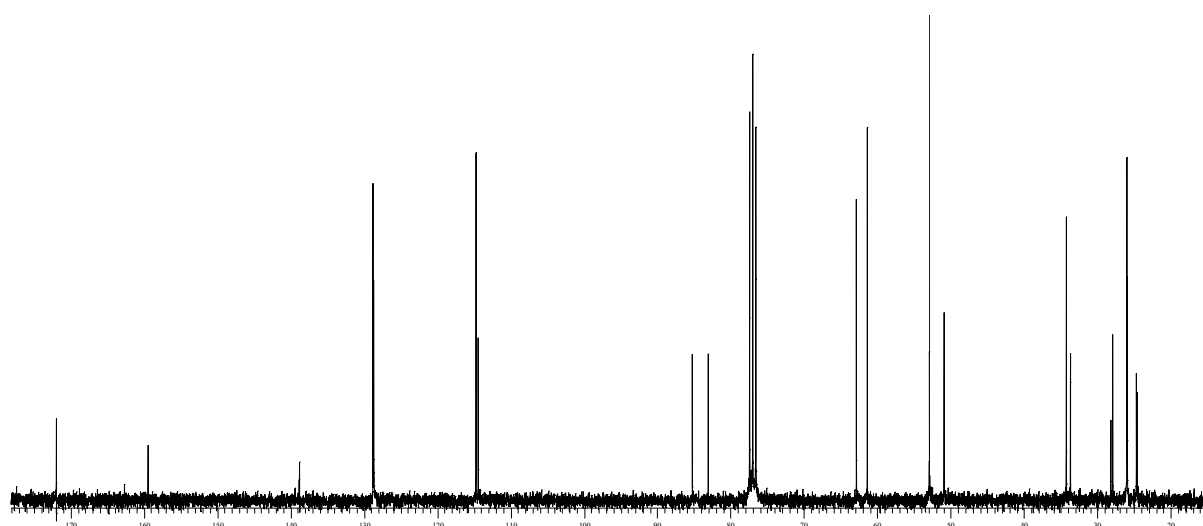

Figure 4: 100 MHz  $^{13}\text{C}$  spectrum of PRD11 (**7c**) recorded on a Bruker AC300 spectrometer.
